# Supplementary material for: Mechanical property measurements enabled by short-term Fourier-transform of atomic force microscopy thermal deflection analysis
Source: publisher site journal article supplement (doi:10.3762/bjnano.16.136), 2025-11-06
Supplement: Additional file 1 [file 2190-4286-16-136-S1.pdf]

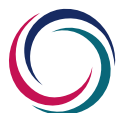

## Supporting Information

for

### **Mechanical property measurements enabled by short-term Fourier-transform of atomic force microscopy thermal deflection analysis**

Thomas Mathias, Roland Bennewitz and Philip Egberts

*Beilstein J. Nanotechnol.* **2025**, *16*, 1952–1962. [doi:10.3762/bjnano.16.136](https://doi.org/10.3762/bjnano.16.136)

### **Equations of motion of the cantilever dynamics models and additional experimental data**

## Equations of Dispersion Relations for Three Cantilever Models

### Solution to model 1 dispersion

$$\sinh(k_n L) \cos(k_n L) - \sin(k_n L) \cosh(k_n L) = \frac{(k_n L)^3 k_c}{3k^*} (1 + \cos(k_n L) \cosh(k_n L)) \quad (S1)$$

### Solution to model 2 dispersion

$$\begin{aligned} & -(\cosh(k_n L_1) \sin(k_n L_1) - \sinh(k_n L_1) \cos(k_n L_1))(1 + \cos(k_n L') \cosh(k_n L')) \\ & -(\cosh(k_n L') \sin(k_n L') - \sinh(k_n L') \cos(k_n L'))(1 - \cos(k_n L_1) \cosh(k_n L_1)) \\ & = 2k_n^3 \frac{EI}{k^*} [1 + \cos(k_n (L_1 + L')) \cosh(k_n (L_1 + L'))] \quad (S2) \end{aligned}$$

### Solution to model 3 dispersion

$$\frac{k^*}{k_c} = \frac{-B \pm \sqrt{B^2 - 4AC}}{6A} \quad (S3)$$

$$A = \left(\frac{\kappa}{k^*}\right) \left(\frac{h}{L_1}\right)^2 (1 - \cos(x) \cosh(xL_1))(1 + \cos(xL') \cosh(xL')) \quad (S4)$$

$$B = B_1 + B_2 + B_3 \quad (S5)$$

$$C = 2(xL_1)^4 (1 + \cos(xL_1) \cosh(xL_1)) \quad (S6)$$

$$\begin{aligned} B_1 &= \left(\frac{h}{L_1}\right)^2 (xL_1)^3 \left(\sin^2(\alpha) + \frac{\kappa}{k_c} \cos^2(\alpha)\right) \\ & [(1 + \cos(xL') \cosh(xL'))(\sin(xL_1) \cosh(nL_1) + \cos(xL_1) \sinh(xL_1)) \\ & - (1 - \cos(nL_1) \cosh(nL_1))(\sin(xL') \cosh(xL') + \cos(xL') \sinh(xL'))] \quad (S7) \end{aligned}$$

$$\begin{aligned}
B_2 &= 2 \left( \frac{h}{L_1} \right) (xL_1)^2 \left( \frac{\kappa}{k_c} \cos(\alpha) \sin(\alpha) \right) \\
&[(1 + \cos(xL') \cosh(xL'))(\sin(xL_1) \sinh(nL_1)) \\
&\quad + (1 - \cos(nL_1) \cosh(nL_1))(\sin(xL') \sinh(xL'))] \quad (S8)
\end{aligned}$$

$$\begin{aligned}
B_3 &= (xL_1)(\cos^2(\alpha) + \frac{\kappa}{k_c} \sin^2(\alpha)) \\
&[(1 + \cos(xL') \cosh(xL'))(\sin(xL_1) \cosh(nL_1) - \cos(xL_1) \sinh(xL_1)) \\
&\quad - (1 - \cos(nL_1) \cosh(nL_1))(\sin(xL') \cosh(xL') - \cos(xL') \sinh(xL'))] \quad (S9)
\end{aligned}$$

$$G^* = \left( \frac{2 - \nu_1}{G_1} + \frac{2 - \nu_2}{G_2} \right)^{-1} \quad (S10)$$

$$G = \frac{1}{2} \left( \frac{E}{1 + \nu} \right) \quad (S11)$$

$$\kappa = 8G^* a = \frac{8G^* k^*}{2E^*} = \frac{4k^* \left( \frac{2-\nu_1}{\frac{1}{2} \frac{E_1}{1+\nu_1}} \right) + \left( \frac{2-\nu_1}{\frac{1}{2} \frac{E_1}{1+\nu_1}} \right)}{E^*} \quad (S12)$$

## Cantilever Frequency Power Spectrum

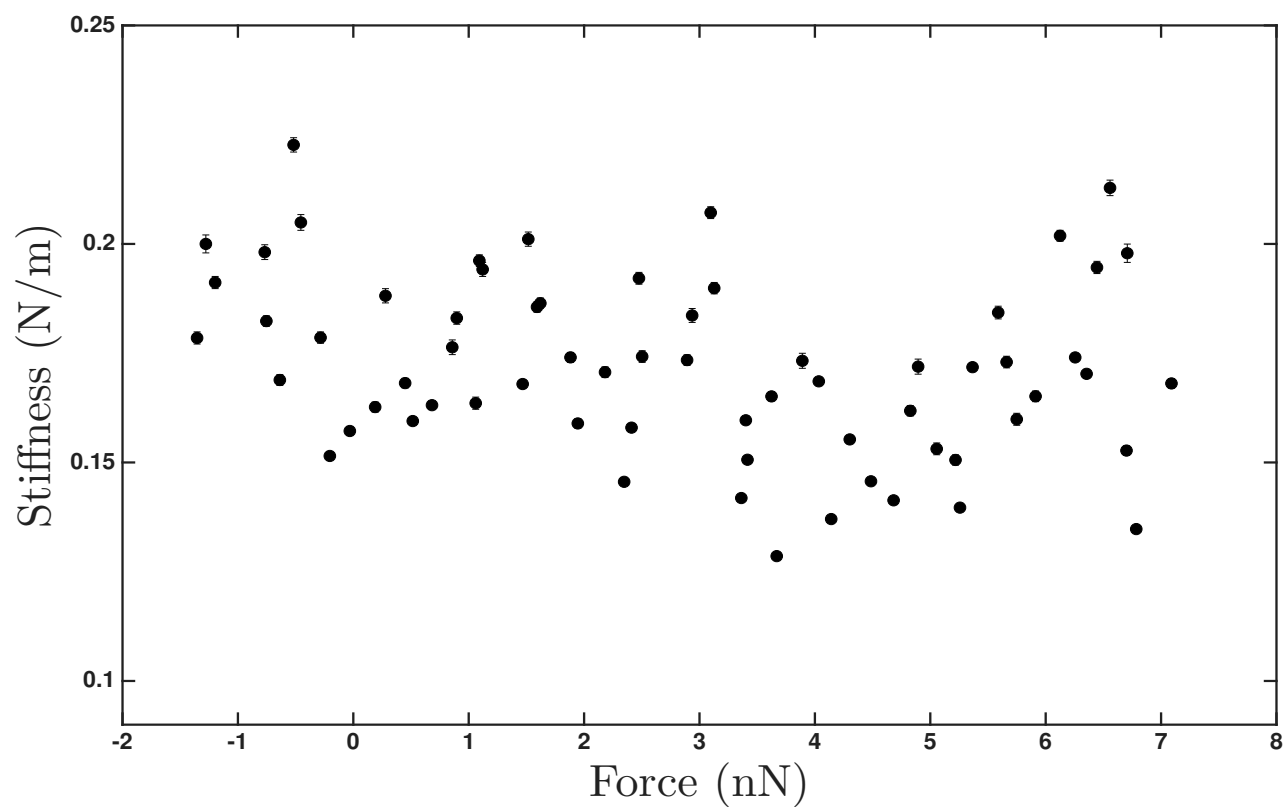

**Figure S1:** Stiffness versus normal force determined from fits of the first normal resonant mode peak in the power spectra of the contact portion of a force spectroscopy sweep.

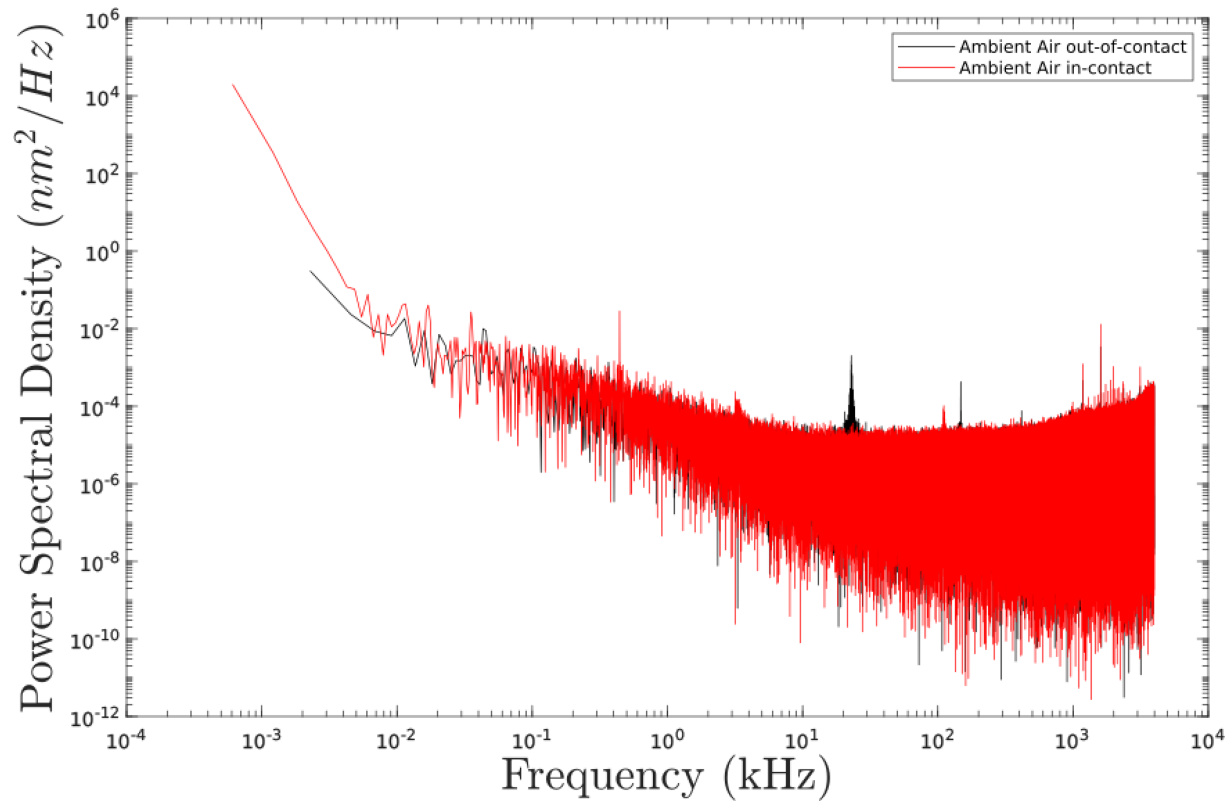

**Figure S2:** Fourier transform of the out-of-contact portion of a diamond coated probe having a spring constant between  $20\text{-}40\text{ N}\cdot\text{m}^{-1}$  on a silicon substrate. The out of contact portion is shown in black and the in-contact portion in red, highlighting the change in the resonant peak locations and shapes between these two stages of the measurement.

## Elastic Modulus Determination of PEO

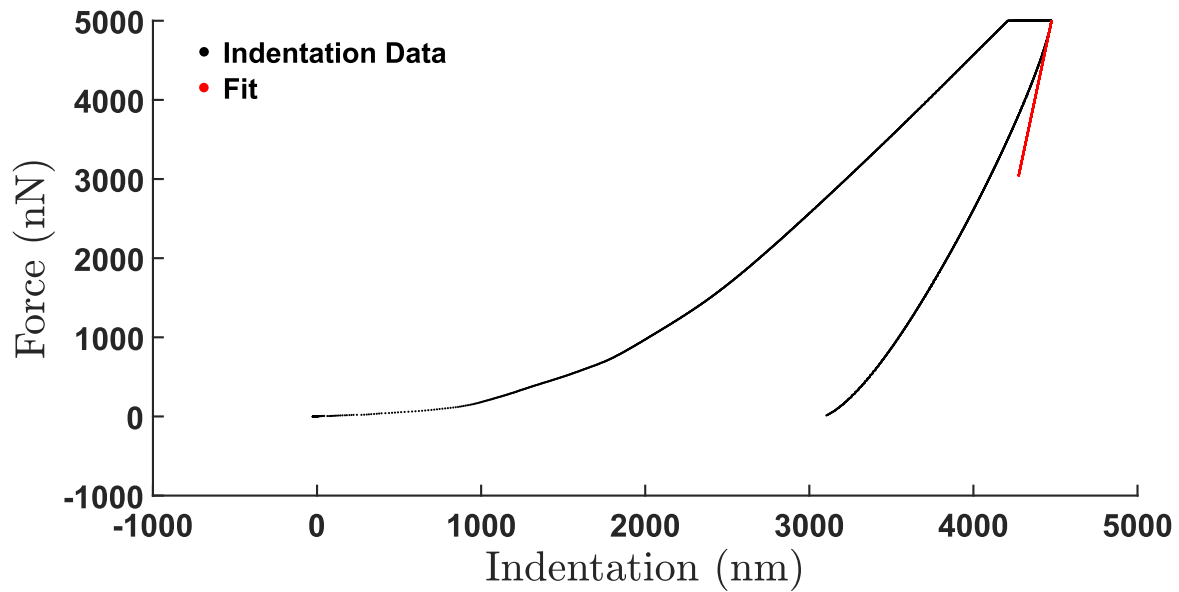

**Figure S3:** Example elastic unloading curves for the PEO sample obtained from nanoindentation experiments with a Berkovich indenter. Slope of curve in red is the linear fit used to determine the Young's modulus of the sample.
